# Supplementary material for: Hydrothermal synthesis of ZnGa2O4 nanophosphors with high internal quantum efficiency for near-infrared pc-LEDs
Source: Royal Society of Chemistry journal article supplement (doi:10.1039/d4dt00333k), 2024-01-01
Supplement: d4dt00333k1.pdf [file d4dt00333k1.pdf]

## Supporting Information

### Hydrothermal Synthesis of $\text{ZnGa}_2\text{O}_4$ Nanophosphors with High Internal Quantum Efficiency for Near-Infrared pc-LED

Chengping Fang,<sup>ab</sup> Shuoheng Wang,<sup>ab</sup> Shuai Wei,<sup>b</sup> Qingxian Xu,<sup>ab</sup> Zeyu Lyu,<sup>b</sup> Sida Shen,<sup>b</sup> Taixing Tan,<sup>\*ab</sup> and Hongpeng You<sup>\*ab</sup>

<sup>a</sup> School of Rare Earths, University of Science and Technology of China, Hefei 230026, P. R. China.

<sup>b</sup> Key Laboratory of Rare Earths, Chinese Academy of Sciences; Ganjiang Innovation Academy, Chinese Academy of Sciences, Ganzhou 341000, China. E-mail: hpyou@ciac.ac.cn, txtan@gia.cas.cn

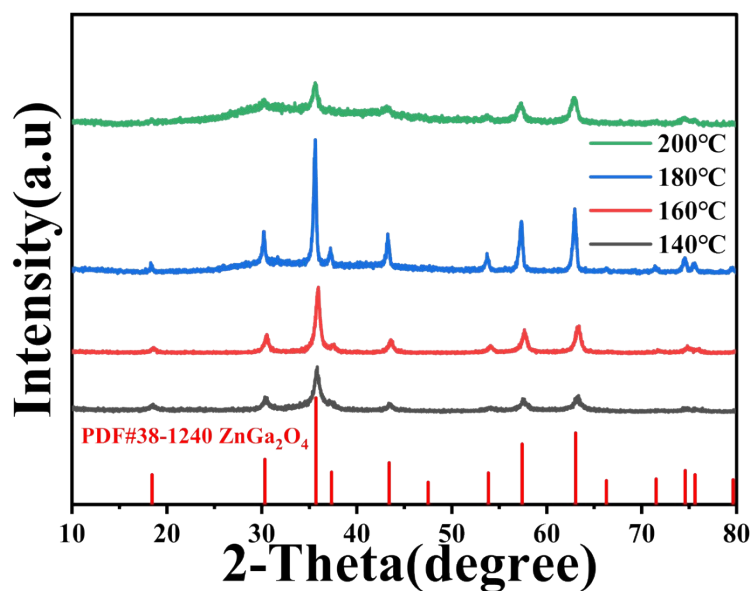

**Figure S1.** XRD image of  $\text{ZnGa}_2\text{O}_4: 0.8\%\text{Cr}^{3+}$  at different hydrothermal temperature

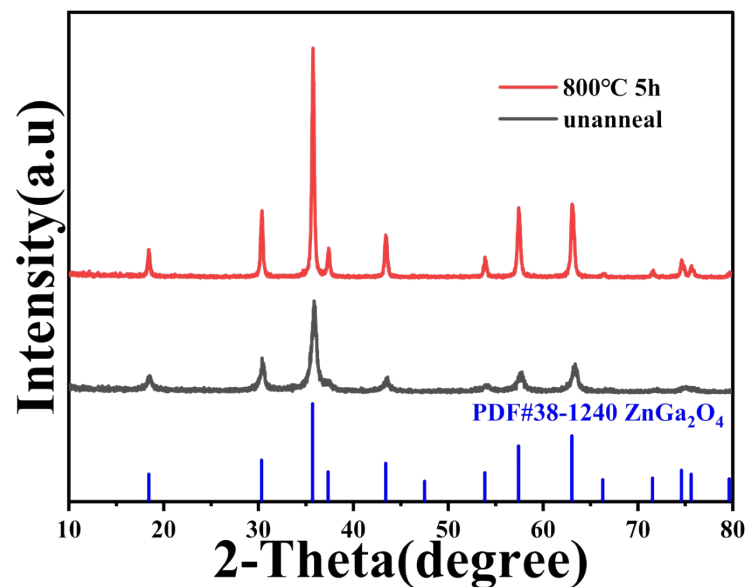

**Figure S2.** XRD comparison pattern before and after annealing of  $\text{ZnGa}_2\text{O}_4:0.8\%\text{Cr}^{3+}$  phosphor at hydrothermal temperature of  $180^\circ\text{C}$ .

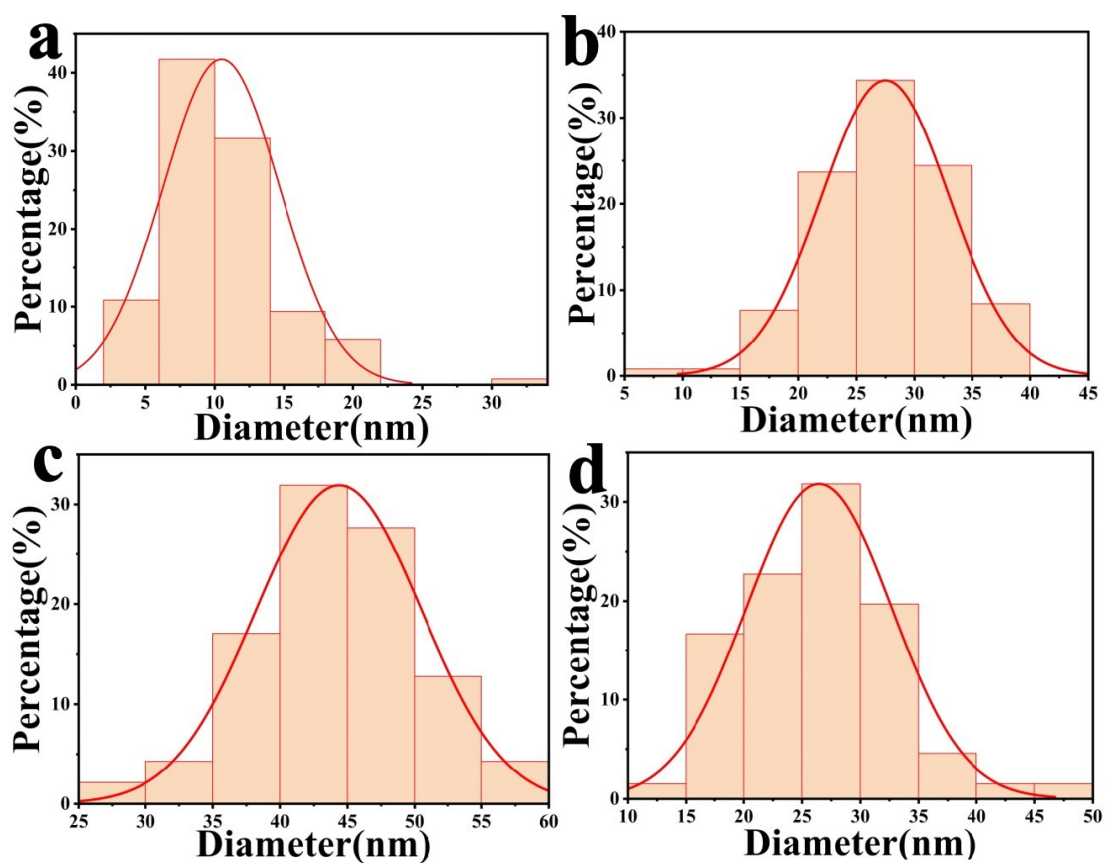

**Figure S3.** Histogram of particle size distribution of  $\text{ZnGa}_2\text{O}_4:0.8\%\text{Cr}^{3+}$  at hydrothermal temperature of  $140^\circ\text{C}$  (b).  $160^\circ\text{C}$  (c).  $180^\circ\text{C}$  (d).  $200^\circ\text{C}$

**Table S1** Related NIR phosphors performance comparison.

| Phosphors                                                           | IQE (%)      | EQE (%)      | Ref.             |
|---------------------------------------------------------------------|--------------|--------------|------------------|
| ZnGa <sub>2</sub> O <sub>4</sub> :Cr <sup>3+</sup>                  | 19.2         | /            | 1                |
| MgGa <sub>2</sub> O <sub>4</sub> :Cr <sup>3+</sup>                  | 94           | /            | 2                |
| MgGa <sub>2</sub> O <sub>4</sub> :Cr <sup>3+</sup>                  | 85.6         | 24.6         | 3                |
| Zn <sub>3</sub> Ga <sub>2</sub> GeO <sub>8</sub> :Cr <sup>3+</sup>  | 88.5         | 18.7         | 4                |
| LiGa <sub>5</sub> O <sub>8</sub> :Cr <sup>3+</sup>                  | 60           | /            | 5                |
| Mg <sub>7</sub> Ga <sub>2</sub> GeO <sub>12</sub> :Cr <sup>3+</sup> | 86           | 37           | 6                |
| <b>ZnGa<sub>2</sub>O<sub>4</sub>:Cr<sup>3+</sup></b>                | <b>90.24</b> | <b>23.32</b> | <b>this work</b> |

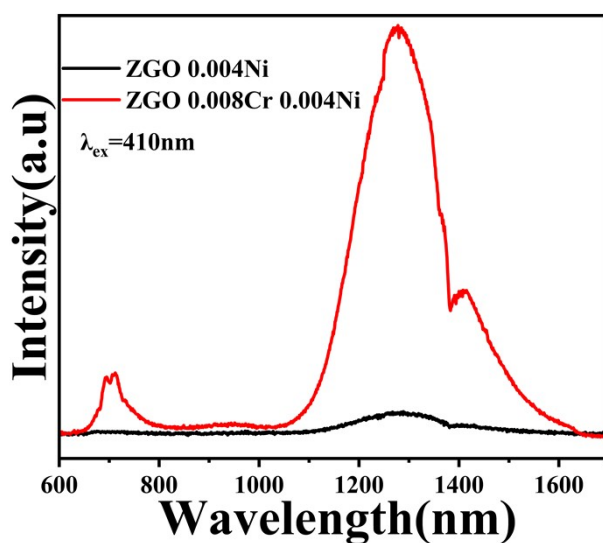

**Figure S4.** PL spectra of the ZnGa<sub>2</sub>O<sub>4</sub>:Ni<sup>2+</sup> and ZnGa<sub>2</sub>O<sub>4</sub>:Cr<sup>3+</sup>,Ni<sup>2+</sup>

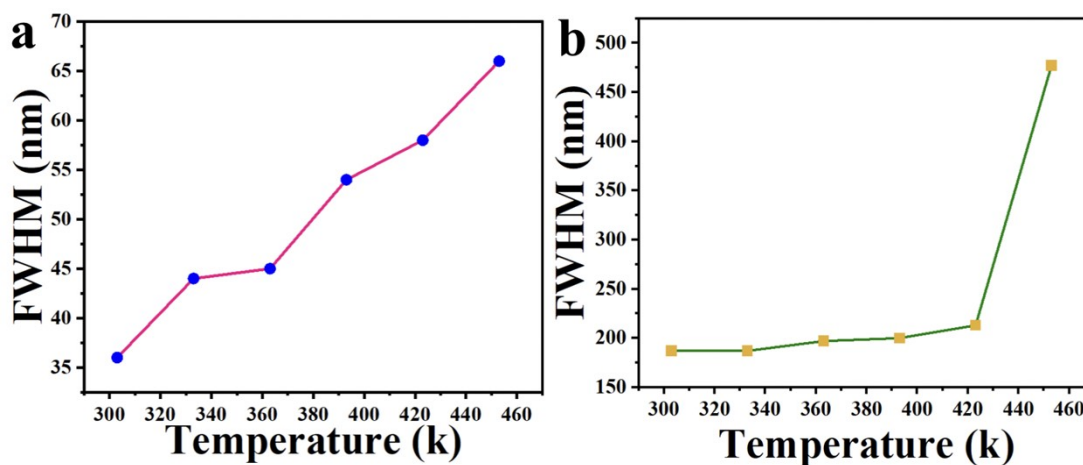

**Figure S5.** Values of FWHM of (a) ZnGa<sub>2</sub>O<sub>4</sub>:0.8%Cr<sup>3+</sup> and (b) ZnGa<sub>2</sub>O<sub>4</sub>:0.8%Cr<sup>3+</sup>,0.4%Ni<sup>2+</sup> phosphors.

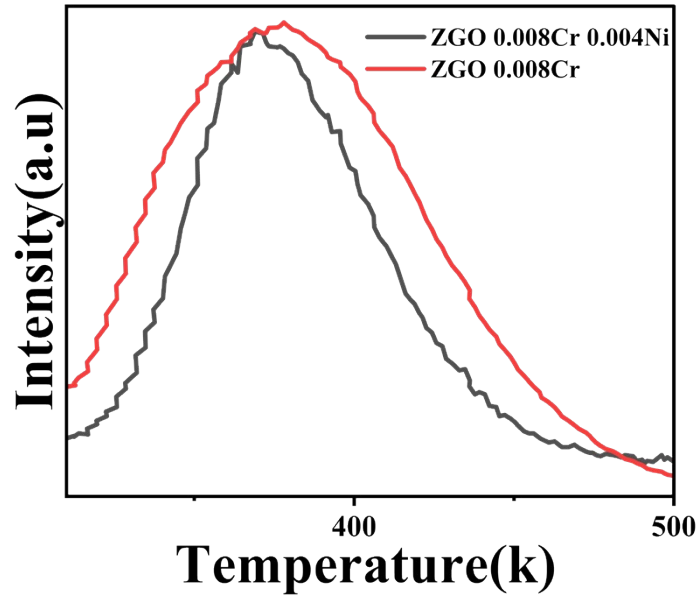

**Figure S6.** TL curves of  $\text{ZnGa}_2\text{O}_4:0.8\%\text{Cr}^{3+}$  and  $\text{ZnGa}_2\text{O}_4:0.8\%\text{Cr}^{3+}$ , 0.4%  $\text{Ni}^{2+}$  phosphors. The samples were pre-irradiated with a 356 nm-laser for 2 min.

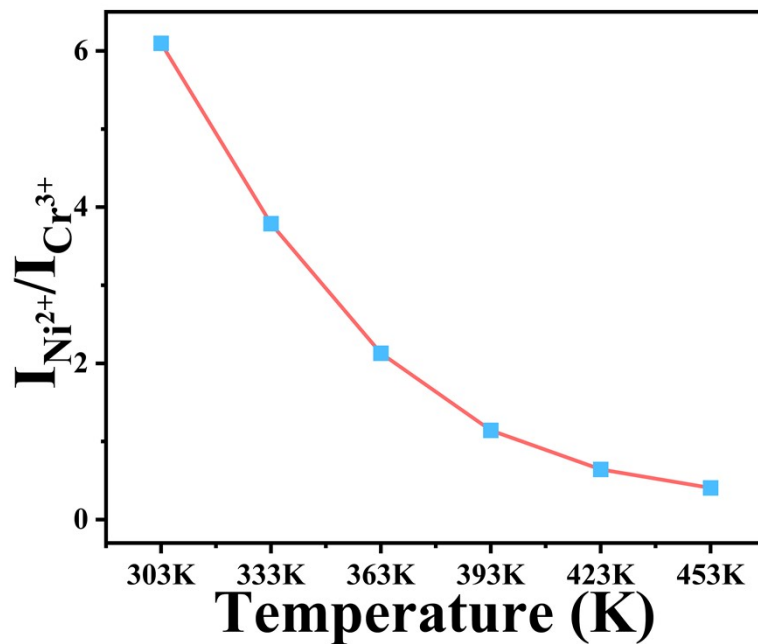

**Figure S7.** The relative intensity ratio of  $\text{Ni}^{2+}$  to  $\text{Cr}^{3+}$  with increasing temperature.

## References

1. A. Satpathy, W. T. Huang, M. H. Chan, T. Y. Su, M. Kaminski, N. Majewska, S. Mahlik, G. Leniec, S. M. Kaczmarek, M. C. Hsiao and R. S. Liu, *Adv. Opt. Mater.*, 2023, **11**.
2. V. Rajendran, C. Y. Chang, M. H. Huang, K. C. Chen, W. T. Huang, M. Kaminski, T. Lesniewski, S. Mahlik, G. Leniec, K. M. Lu, D. H. Wei, H. Chang and R. S. Liu, *Adv. Opt. Mater.*, 2023, DOI: 10.1002/adom.202302645.

3. L. Q. Yao, Q. Y. Jia, S. J. Yu, C. Liang, J. Q. Jiang and Q. Y. Shao, *Adv. Opt. Mater.*, 2023, **11**.
4. S. Q. Liu, Y. T. Zheng, D. F. Peng, J. Zhao, Z. Song and Q. L. Liu, *Adv. Funct. Mater.*, 2023, **33**.
5. V. Singh, R. Ravikumar, G. Sivaramaiah, J. L. Rao and S. H. Kim, *Mater. Res. Bull.*, 2015, **61**, 183-188.
6. G. H. Wei, P. L. Li, R. Li, J. H. Li, Y. W. Shi, Y. Wang, S. X. He, Y. B. Yang, H. Suo and Z. J. Wang, *Inorg Chem.*, 2022, **61**, 5665-5671.
